# Supplementary material for: Superior electrochemical performances of double-shelled CuO yolk–shell powders formed from spherical copper nitrate–polyvinylpyrrolidone composite powders
Source: Royal Society of Chemistry journal article supplement (doi:10.1039/c4ra06054g), 2014-10-21
Supplement: c4ra06054g1.pdf [file c4ra06054g1.pdf]

## Supporting Information

### Superior electrochemical performances of double-shelled CuO yolk-shell powders formed from spherical copper nitrate- polyvinylpyrrolidone composite

Young Jun Hong and Yun Chan Kang\*

Department of Chemical Engineering, Konkuk University, 1 Hwayang-dong, Gwangjin-gu,  
Seoul 143-701, Korea

#### **This file includes:**

- XRD patterns of the precursor and post-treated powders.
- Thermogravimetric curve of the copper nitrate-PVP composite powders coated with  $\text{Cu}_2(\text{OH})_3\text{NO}_3$ -carbon layer.
- EDX spectra of the precursor and post-treated powders at 200°C.
- Long-term cycling performance of the CuO yolk-shell powders at a current density of 1000  $\text{mA g}^{-1}$ .
- Nitrogen adsorption-desorption isotherms and pore size distributions of (a) the commercial CuO nanopowders and (b) the CuO yolk-shell powders.
- Morphologies and elemental mapping images of the CuO yolk-shell powders obtained after after 50 cycles at a current density of 500  $\text{mA g}^{-1}$ .

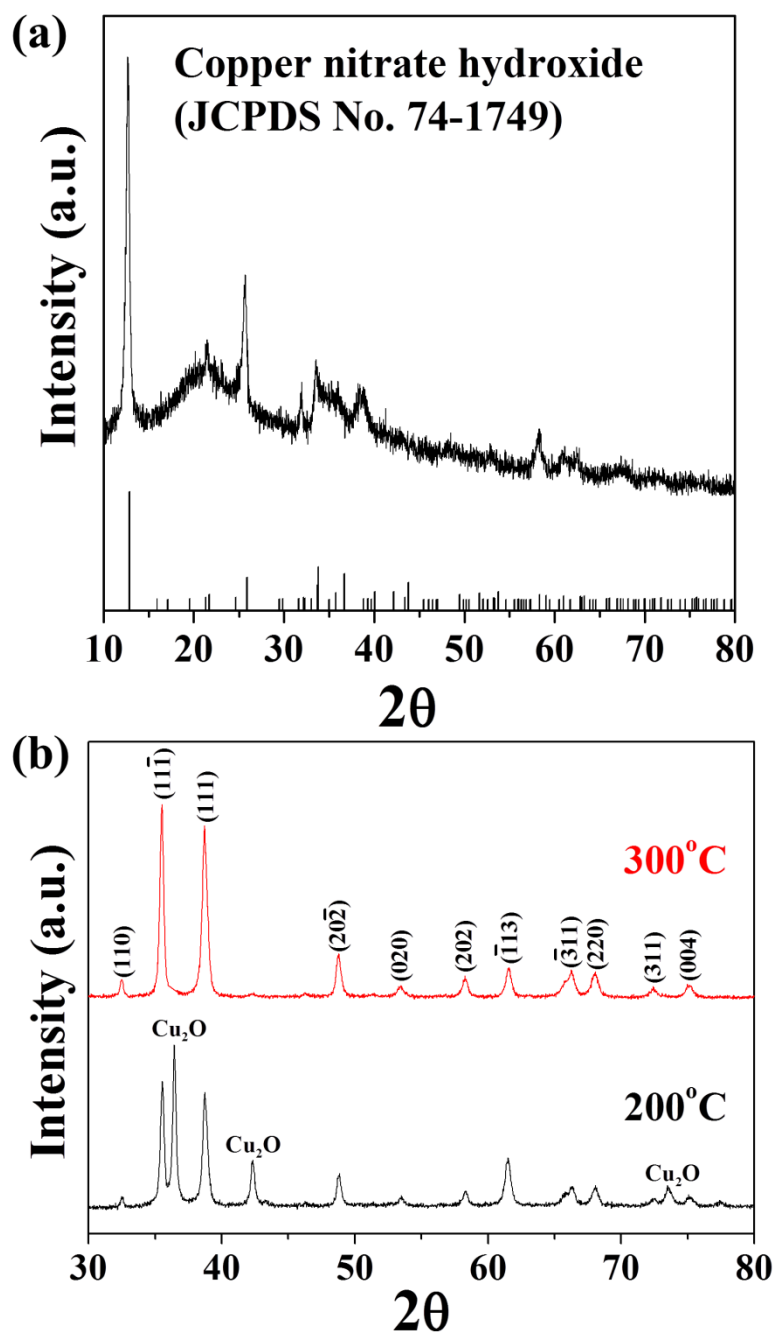

**Fig. S1** XRD patterns of the (a) precursor and (b) post-treated powders.

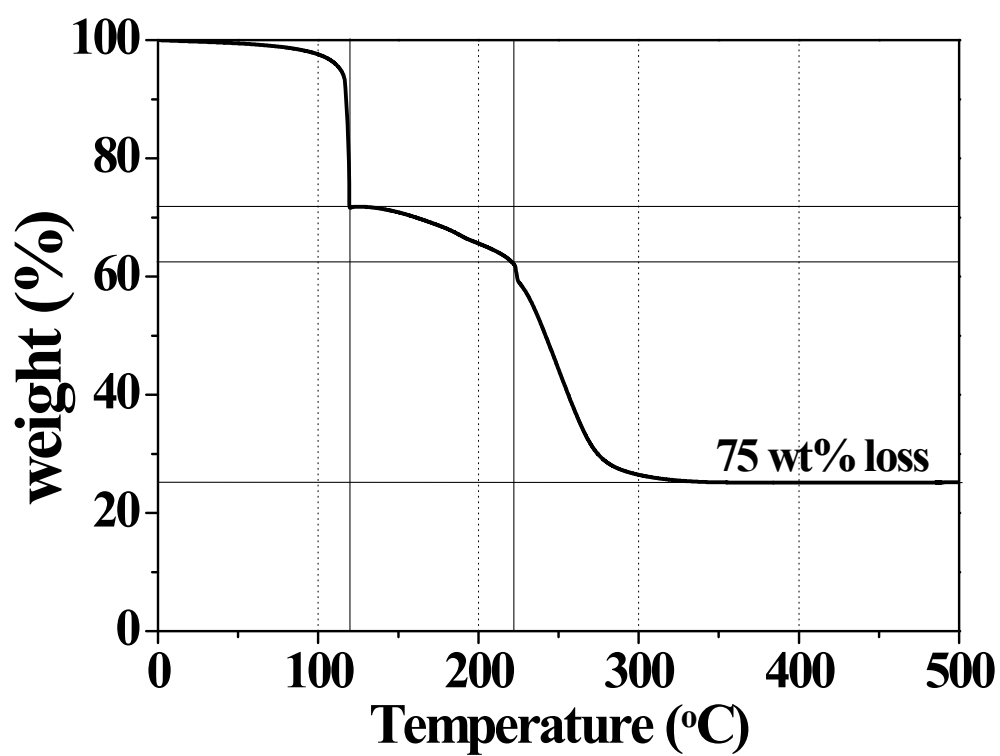

**Fig. S2** Thermogravimetric curve of the copper nitrate-PVP composite powders coated with  $\text{Cu}_2(\text{OH})_3\text{NO}_3$ -carbon layer.

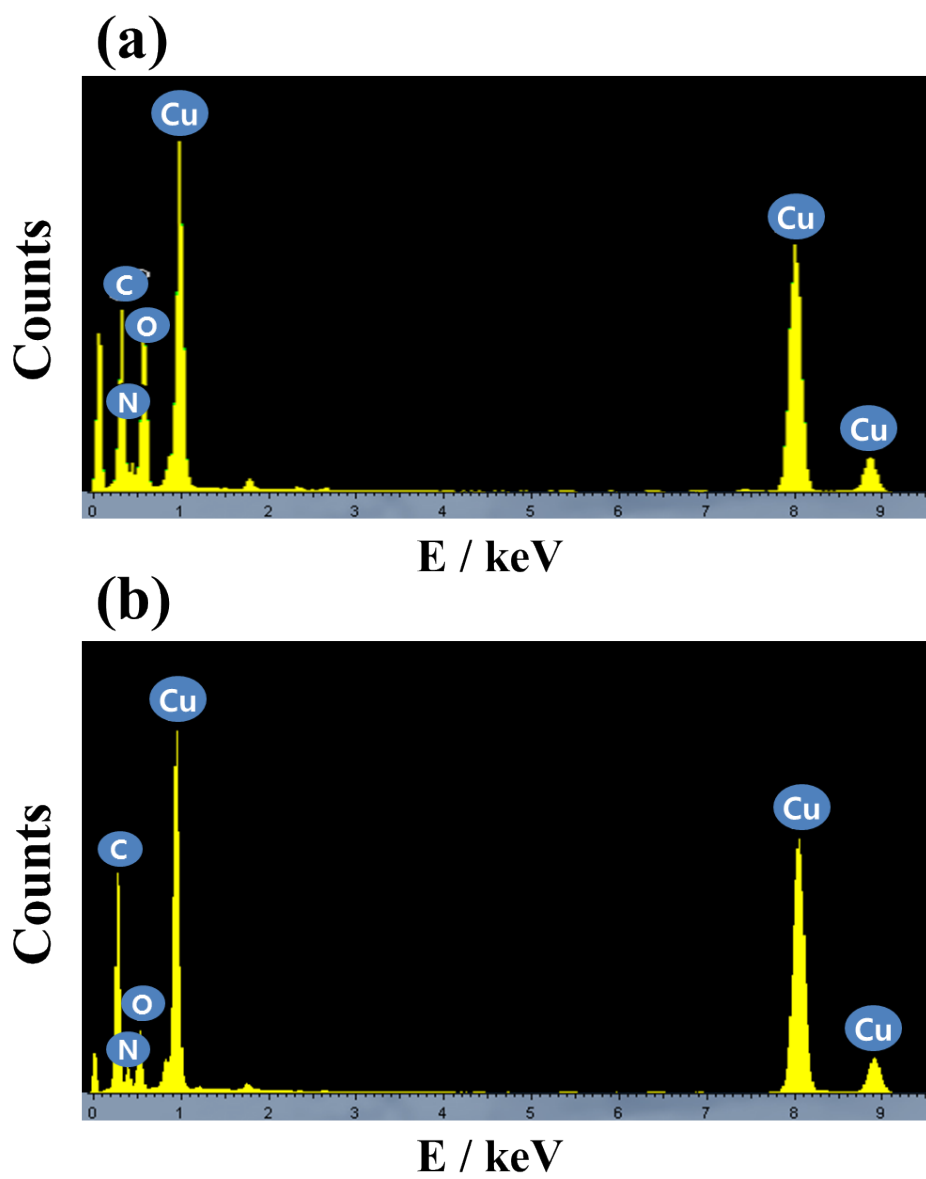

**Fig. S3.** EDX spectra of the (a) precursor and (b) post-treated powders at 200°C.

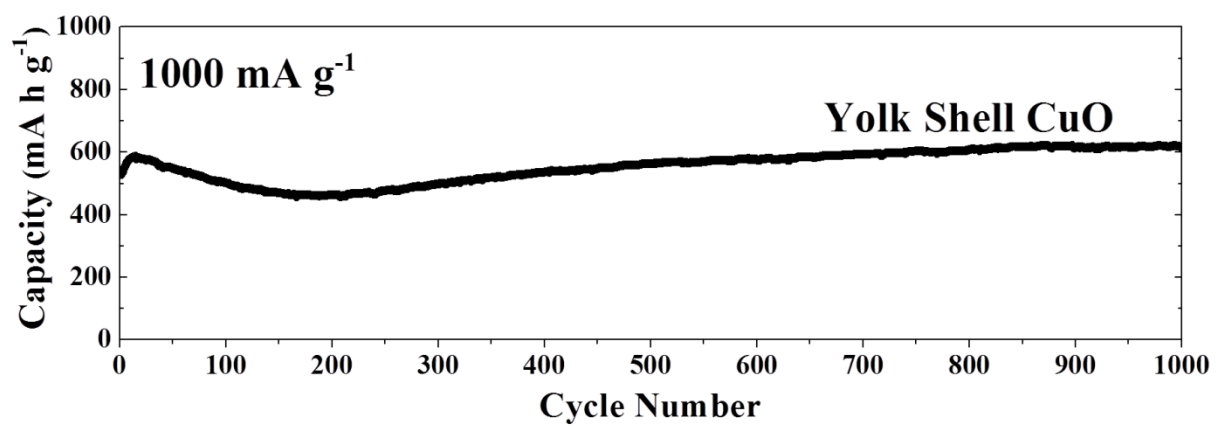

**Fig. S4.** Long-term cycling performance of the CuO yolk-shell powders at a current density of 1000 mA g<sup>-1</sup>.

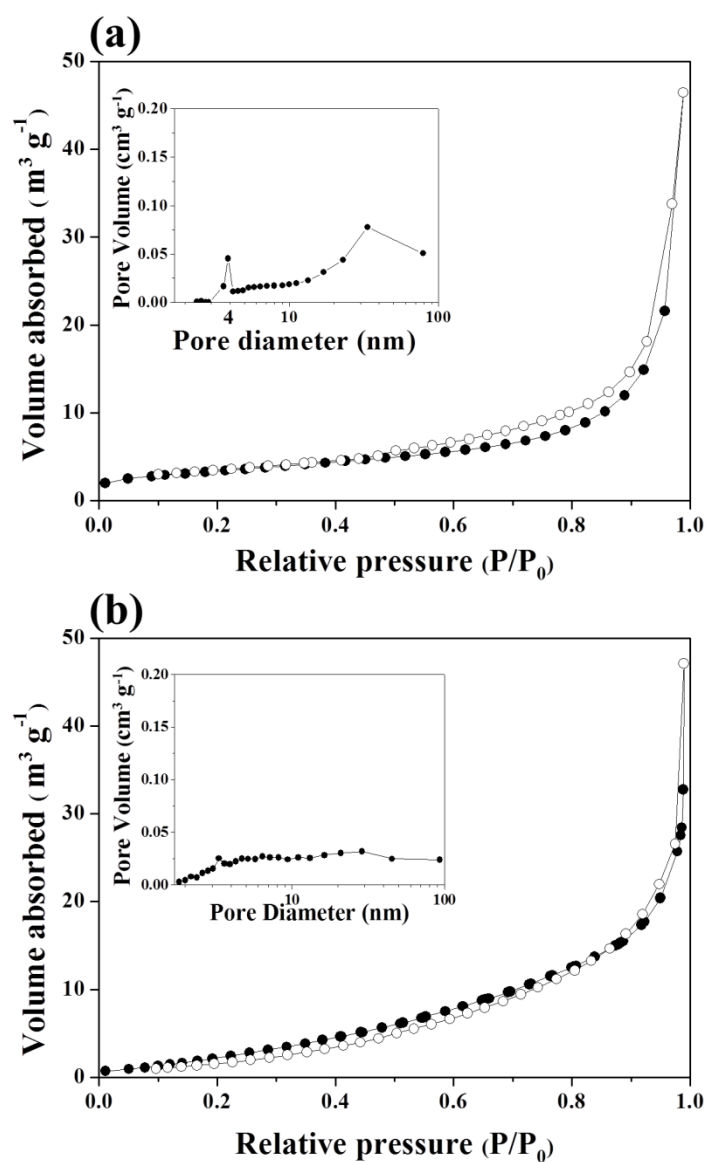

**Fig. S5.** Nitrogen adsorption-desorption isotherms and pore size distributions of (a) the commercial CuO nanopowders and (b) the CuO yolk-shell powders.

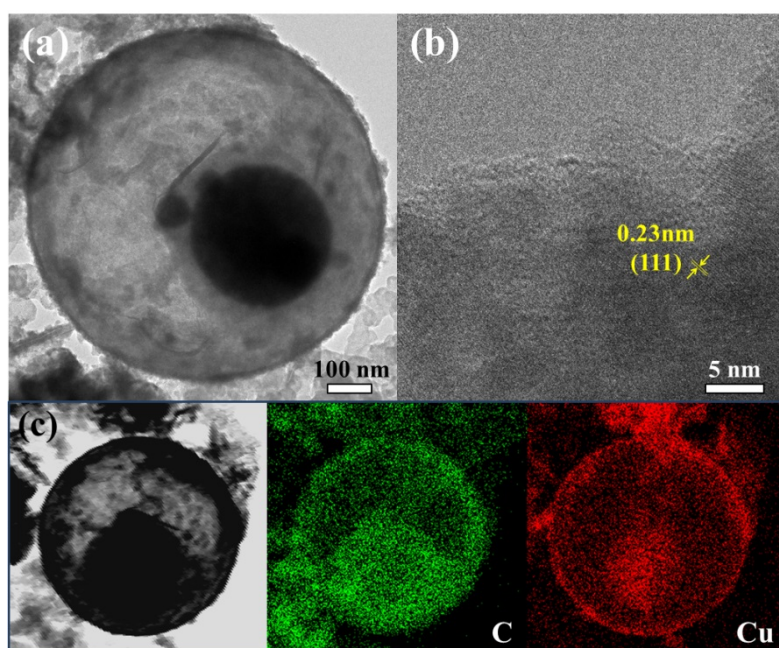

**Fig. S6.** Morphologies and dot-mapping images of the CuO yolk-shell powders obtained after after 50 cycles at a current density of  $500 \text{ mA g}^{-1}$ .

Table S1. Electrochemical properties of nanostructured CuO materials with different morphologies prepared by various preparation methods.

| Material<br>[preparation method]                                                  | Voltage<br>range [V] | Current<br>density<br>[mA g <sup>-1</sup> ] | Initial C <sub>dis</sub> /C <sub>cha</sub><br>[mA h g <sup>-1</sup> ] | Discharge<br>capacity<br>[mA h g <sup>-1</sup> ] | Cycle<br>number | Ref.         |
|-----------------------------------------------------------------------------------|----------------------|---------------------------------------------|-----------------------------------------------------------------------|--------------------------------------------------|-----------------|--------------|
| complex hollow CuO sphere<br>[precipitation method]                               | 0.001 – 3            | 150                                         | 1167 / -                                                              | ~400                                             | 50              | [16]         |
| CuO urchin-like particles<br>[precipitation method]                               | 0.001 – 3            | 150                                         | 967 / 614                                                             | 560 (charge)                                     | 50              | [17]         |
| CuO/graphene<br>nanocomposite flower<br>[simple liquid method]                    | 0.01 – 3             | 65                                          | ~600 / ~900                                                           | 600                                              | 100             | [18]         |
| leaf-like CuO nanostructures<br>[hydrothermal]                                    | 0.01 – 3             | -                                           | 1028 / 580                                                            | 440                                              | 30              | [20]         |
| leaf-like CuO mesocrystal<br>[electrochemical synthesis]                          | 0.01 – 3             | -                                           | 1063 / 674                                                            | 500                                              | 30              | [21]         |
| single crystalline CuO anorods<br>and 3D CuO nanostructures<br>[one-step thermal] | 0.01 – 3             | 100                                         | 1143 / 670                                                            | 516                                              | 100             | [22]         |
| porous CuO hollow<br>octahedra<br>[metal organic framework<br>templates]          | 0.05 – 3             | 100                                         | 1242 / 775                                                            | 470                                              | 100             | [23]         |
| hierarchical CuO hollow<br>microspheres<br>[hydrothermal]                         | 0.01 – 3             | 67                                          | 971 / 606                                                             | 598                                              | 30              | [24]         |
| highly porous CuO nanorods<br>[precipitation method]                              | 0.001 – 3            | 300                                         | 703 / -                                                               | 654                                              | 200             | [25]         |
| CuO nanowalnuts<br>[precipitation method]                                         | 0.02-3.0             | 67                                          | 867 / -                                                               | 407                                              | 30              | [26]         |
| sponge-like architected<br>cupric oxides<br>[sintering of Cu NPs]                 | 0.001-3.0            | 130                                         | - / 662                                                               | 667                                              | 50              | [27]         |
| bundle-like CuO structures<br>[precipitation method]                              | 0.001-3.0            | 200                                         | 1179 / -                                                              | 666                                              | 50              | [28]         |
| CuO nanofibers<br>[electrospinning]                                               | 0.005-3.0            | 100                                         | 1071 / 619                                                            | 452                                              | 100             | [29]         |
| carbon-coated CuO hollow<br>spheres<br>[spray pyrolysis]                          | 0 – 3.0              | 670                                         | 1003 / 551                                                            | 750                                              | 300             | [31]         |
| double-shelled CuO yolk-shell<br>powders<br>[spray pyrolysis]                     | 0.01 – 3.0           | 1000                                        | 1237 / 538                                                            | 615                                              | 1000            | This<br>work |
